# Supplementary material
Source: PubMed Central journal article supplement (PMC4610302)
Supplement: jm501829f_si_001.pdf [file jm501829f_si_001.pdf]

# Supporting Information

## Highly selective salicylketoxime-based estrogen receptor beta agonists display antiproliferative activities in a glioma model

Ilaria Paterni, Simone Bertini, Carlotta Granchi, Tiziano Tuccinardi, Marco Macchia, Adriano Martinelli, Isabella Caligiuri, Giuseppe Toffoli, Flavio Rizzolio, Kathryn E. Carlson, Benita S. Katzenellenbogen, John A. Katzenellenbogen, Filippo Minutolo\*

\* Correspondence should be addressed to FM ([filippo.minutolo@farm.unipi.it](mailto:filippo.minutolo@farm.unipi.it))

### Table of Contents

|                                                                                                               |         |
|---------------------------------------------------------------------------------------------------------------|---------|
| <b>Figure S1.</b> Docking analysis of salicylketoxime <b>2b</b> into ER $\beta$ binding site.                 | S2      |
| Chromatograms and HRMS characterization of <b>2a-m</b>                                                        | S3-S15  |
| Analytical data on intermediate compounds                                                                     | S16-S18 |
| <b>Table S1.</b> Body weight vs. treatment time of animals treated with <b>1</b> , <b>2a</b> , or <b>2c</b> . | S19     |

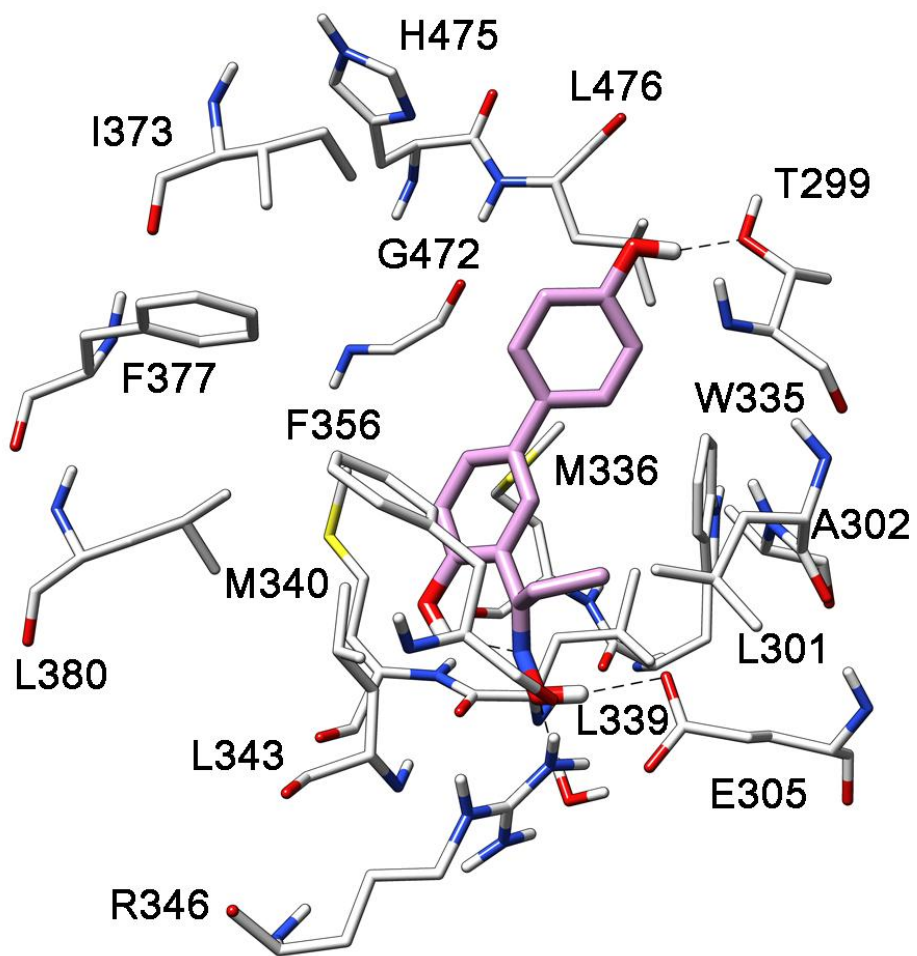

**Figure S1.** Docking analysis of salicylketoxime **2b** into ER $\beta$  binding site.

Data File: D:\32Karat\Projects\HPLC\Data\2012\novembre\28-11-12\IP9\_254bis.dat  
 Metodo: D:\32Karat\Projects\HPLC\Method\tamp\_amm\_acetat-acetnitrile\_1ml-min\_254nm\_da50-50a95-5.met  
 Acquisito: 11/28/2012 4:41:28 PM  
 Stampato: 12/05/2012 08:42:30 AM

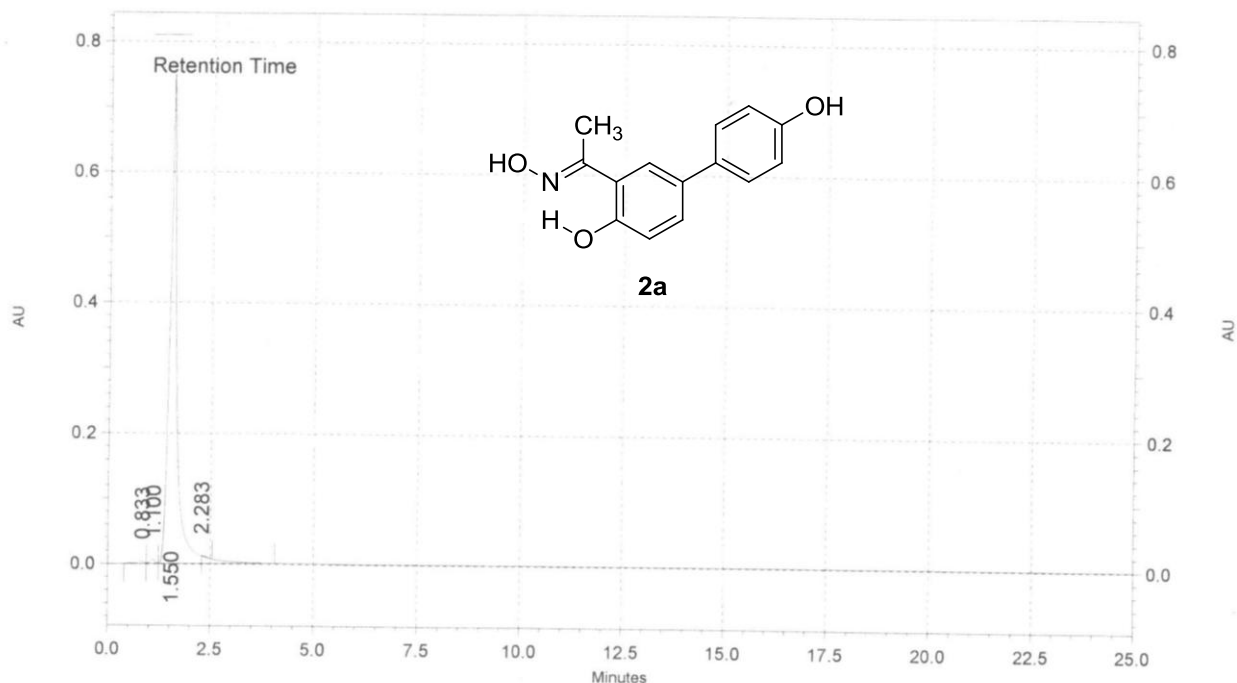

## Det 166 Results

| Nome   | Migration Time | Area % | Area    |
|--------|----------------|--------|---------|
|        | 0.833          | 0.44   | 41668   |
|        | 1.100          | 0.52   | 49670   |
|        | 1.550          | 98.97  | 9400594 |
|        | 2.283          | 0.07   | 6301    |
| Totals |                | 100.00 | 9498233 |

## Elemental Composition Report

Page 1

## Single Mass Analysis

Tolerance = 10.0 PPM / DBE: min = -1.5, max = 600.0

Element prediction: Off

Number of isotope peaks used for i-FIT = 3

## Monoisotopic Mass, Even Electron Ions

129 formula(e) evaluated with 1 results within limits (all results (up to 1000) for each mass)

Elements Used:

C: 0-120 H: 0-180 N: 0-5 O: 0-6

Kim, Sung Hoon, ADC292

University of Illinois, SCS, Mass Spectrometry Lab

Qtof\_54237 18 (1.350) AM (Cen,3, 80.00, Ar,15000.0,558.36,0.70,LS 3); Sm (SG, 2x5.00); Cm (17:18)

Q-tof UE521

1: TOF MS ES+

2.78e+003

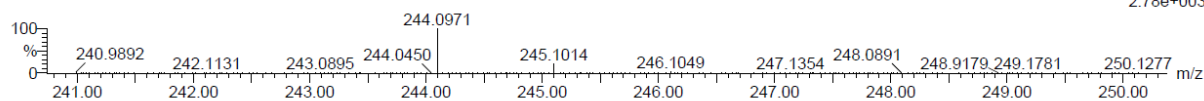

Minimum:

Maximum: 5.0 10.0 -1.5 600.0

| Mass     | Calc. Mass | mDa  | PPM  | DBE | i-FIT | Formula      |
|----------|------------|------|------|-----|-------|--------------|
| 244.0971 | 244.0974   | -0.3 | -1.2 | 8.5 | 9.8   | C14 H14 N O3 |

Data File: D:\32Karat\Projects\HPLC\Data\2012\novembre\28-11-12\IP27\_254.dat  
 Metodo: D:\32Karat\Projects\HPLC\Method\tamp\_amm\_acetat-acetnitrile\_1ml-min\_254nm\_da70-30a95-5.met  
 Acquisito: 11/28/2012 2:47:33 PM  
 Stampato: 12/05/2012 08:40:50 AM

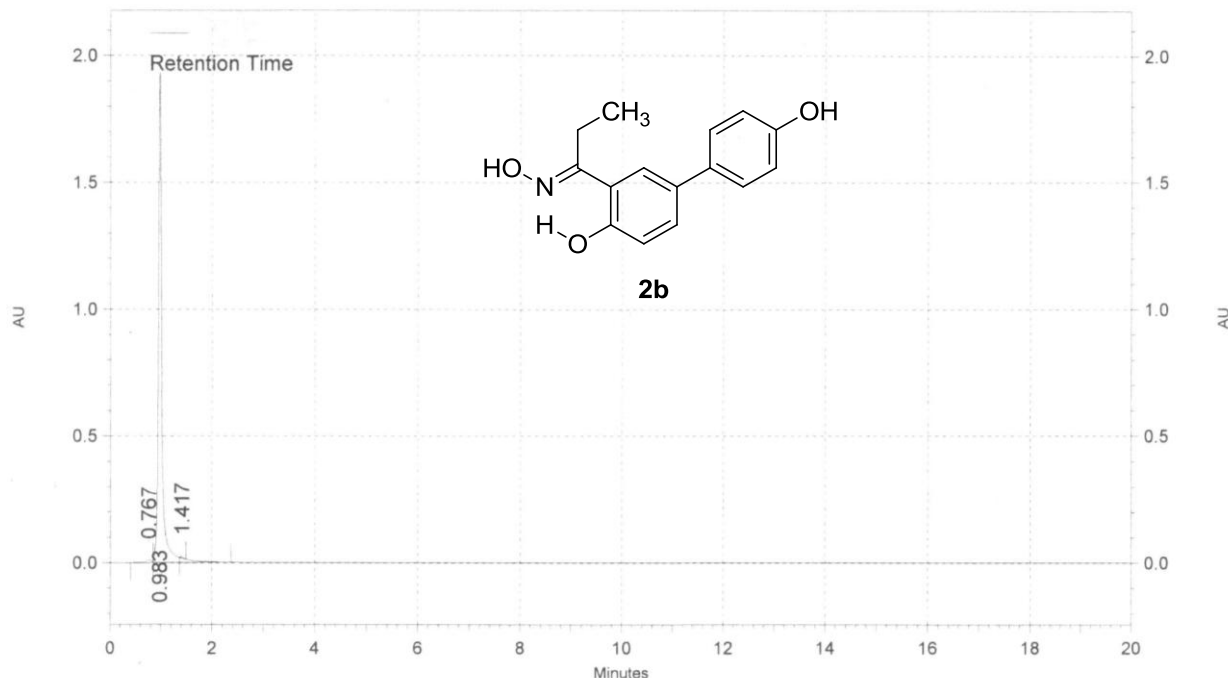

Det 166 Results

| Nome   | Migration Time | Area % | Area    |
|--------|----------------|--------|---------|
|        | 0.767          | 0.78   | 75349   |
|        | 0.983          | 99.01  | 9560728 |
|        | 1.417          | 0.21   | 20563   |
| Totals |                |        | 9656640 |

Elemental Composition Report

Single Mass Analysis

Tolerance = 10.0 PPM / DBE: min = -1.5, max = 600.0  
 Element prediction: Off  
 Number of isotope peaks used for i-FIT = 3

Monoisotopic Mass, Even Electron Ions

136 formula(e) evaluated with 1 results within limits (all results (up to 1000) for each mass)

Elements Used:

C: 0-120 H: 0-180 N: 0-5 O: 0-6

Kim, Sung Hoon, IP27

University of Illinois, SCS, Mass Spectrometry Lab

Qtof\_54243 15 (1.126) AM (Cen,3, 80.00, Ar,15000.0,558.36,0.70,LS 3); Sm (SG, 2x5.00); Cm (14:15)

Q-tof UE521  
 1: TOF MS ES+  
 1.18e+003

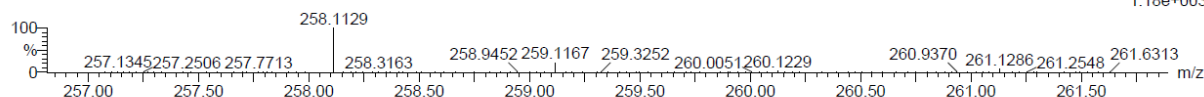

Minimum: -1.5  
 Maximum: 600.0

| Mass     | Calc. Mass | mDa  | PPM  | DBE | i-FIT | Formula      |
|----------|------------|------|------|-----|-------|--------------|
| 258.1129 | 258.1130   | -0.1 | -0.4 | 8.5 | 4.4   | C15 H16 N O3 |

Data File: D:\32Karat\Projects\HPLC\Data\2012\novembre\29-11-12\IP30\_254.dat  
 Metodo: D:\32Karat\Projects\HPLC\Method\tamp\_amm\_acetat-acetnitrile\_0\_7ml-min\_254nm.met  
 Acquisito: 11/29/2012 9:58:52 AM  
 Stampato: 12/05/2012 09:07:47 AM

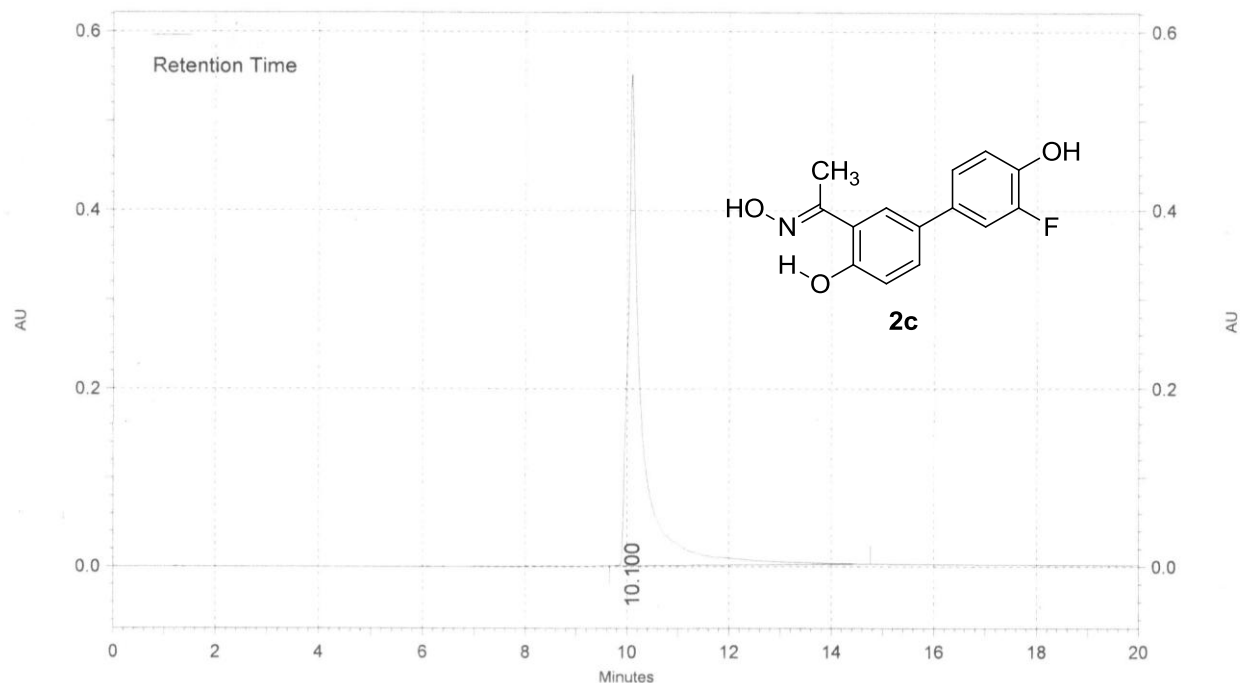

Det 166 Results

| Nome          | Migration Time | Area % | Area     |
|---------------|----------------|--------|----------|
|               | 10.100         | 100.00 | 10259071 |
| <b>Totals</b> |                |        |          |
|               |                | 100.00 | 10259071 |

## Elemental Composition Report

Page 1

## Single Mass Analysis

Tolerance = 10.0 PPM / DBE: min = -1.5, max = 600.0

Element prediction: Off

Number of isotope peaks used for i-FIT = 3

Monoisotopic Mass, Even Electron Ions

129 formula(e) evaluated with 1 results within limits (all results (up to 1000) for each mass)

Elements Used:

C: 0-120 H: 0-180 N: 0-5 O: 0-6 F: 1-1

Kim, Sung Hoon, ADC359

University of Illinois, SCS, Mass Spectrometry Lab

Qtof\_54238 44 (3.291) AM (Cen,3, 80.00, Ar,15000.0,558.36,0.70,LS 3); Sm (SG, 2x5.00); Cm (44.45)

Q-tof UE521

1: TOF MS ES+

1.71e+003

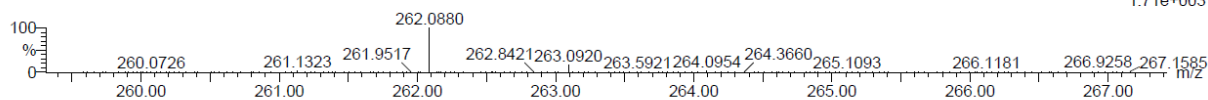

Minimum:

Maximum: 5.0 10.0 -1.5 600.0

| Mass     | Calc. Mass | mDa | PPM | DBE | i-FIT | Formula        |
|----------|------------|-----|-----|-----|-------|----------------|
| 262.0880 | 262.0879   | 0.1 | 0.4 | 8.5 | 2.4   | C14 H13 N O3 F |

Data File: D:\32Karat\Projects\HPLC\Data\2012\novembre\28-11-12\IP35\_254.dat  
 Metodo: D:\32Karat\Projects\HPLC\Method\tamp\_amm\_acetat-acetonitrile\_0\_7ml-min\_254nm.met  
 Acquisito: 11/28/2012 5:31:02 PM  
 Stampato: 12/05/2012 08:47:12 AM

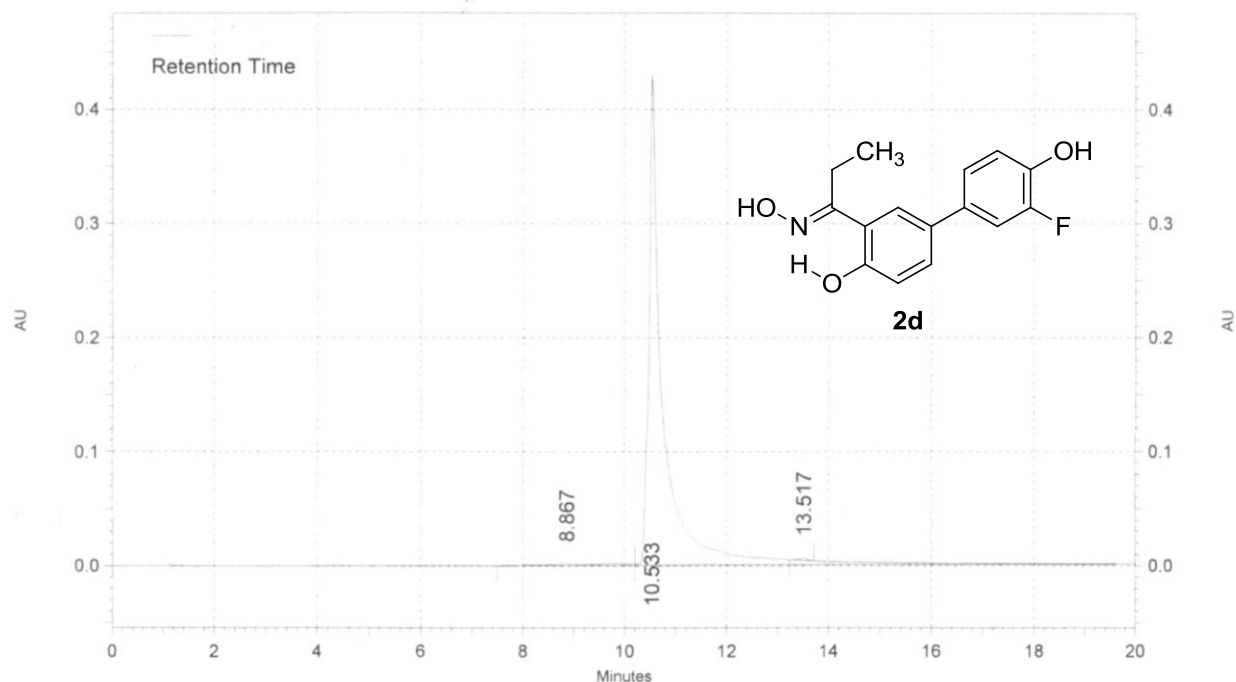

## Det 166 Results

| Nome   | Migration Time | Area % | Area    |
|--------|----------------|--------|---------|
|        | 8.867          | 1.47   | 129970  |
|        | 10.533         | 98.25  | 8675809 |
|        | 13.517         | 0.27   | 24145   |
| Totals |                | 100.00 | 8829924 |

## Elemental Composition Report

Page 1

## Single Mass Analysis

Tolerance = 10.0 PPM / DBE: min = -1.5, max = 600.0

Element prediction: Off

Number of isotope peaks used for i-FIT = 3

## Monoisotopic Mass, Even Electron Ions

136 formula(e) evaluated with 1 results within limits (all results (up to 1000) for each mass)

Elements Used:

C: 0-120 H: 0-180 N: 0-5 O: 0-6 F: 1-1

Kim, Sung Hoon, IP35

University of Illinois, SCS, Mass Spectrometry Lab

Qtof\_54247 52 (3.887) AM (Cen,3, 80.00, Ar,15000.0,558.36,0.70,LS 3); Sm (SG, 2x5.00); Cm (52:54)

Q-tof UE521

1: TOF MS ES+

5.79e+003

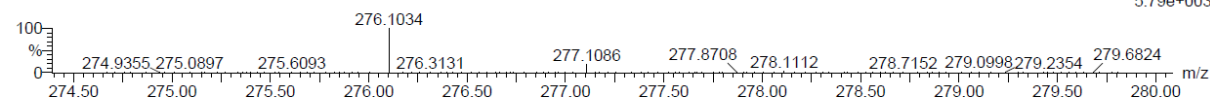

Minimum: -1.5  
 Maximum: 5.0 10.0 600.0

| Mass     | Calc. Mass | mDa  | PPM  | DBE | i-FIT | Formula        |
|----------|------------|------|------|-----|-------|----------------|
| 276.1034 | 276.1036   | -0.2 | -0.7 | 8.5 | 5.1   | C15 H15 N O3 F |

Data File: D:\32Karat\Projects\HPLC\Data\2012\novembre\28-11-12\IP10\_254\_70-30\_bis.dat  
 Metodo: D:\32Karat\Projects\HPLC\Method\tamp\_amm\_acetat-acetonitrile\_1ml-min\_254nm\_da70-30a95-5.met  
 Acquisito: 11/28/2012 11:18:57 AM  
 Stampato: 12/04/2012 02:06:36 PM

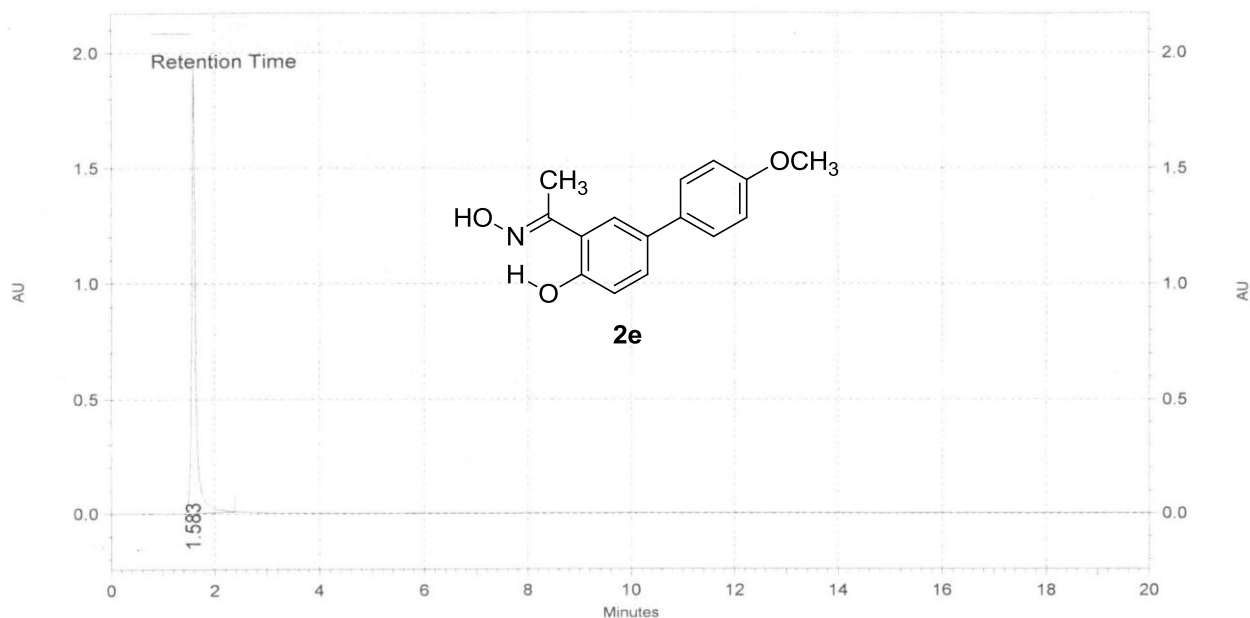

Det 166 Results

| Nome | Migration Time | Area % | Area     |
|------|----------------|--------|----------|
|      | 1.583          | 100.00 | 10096221 |

|        |  |        |          |
|--------|--|--------|----------|
| Totals |  | 100.00 | 10096221 |
|--------|--|--------|----------|

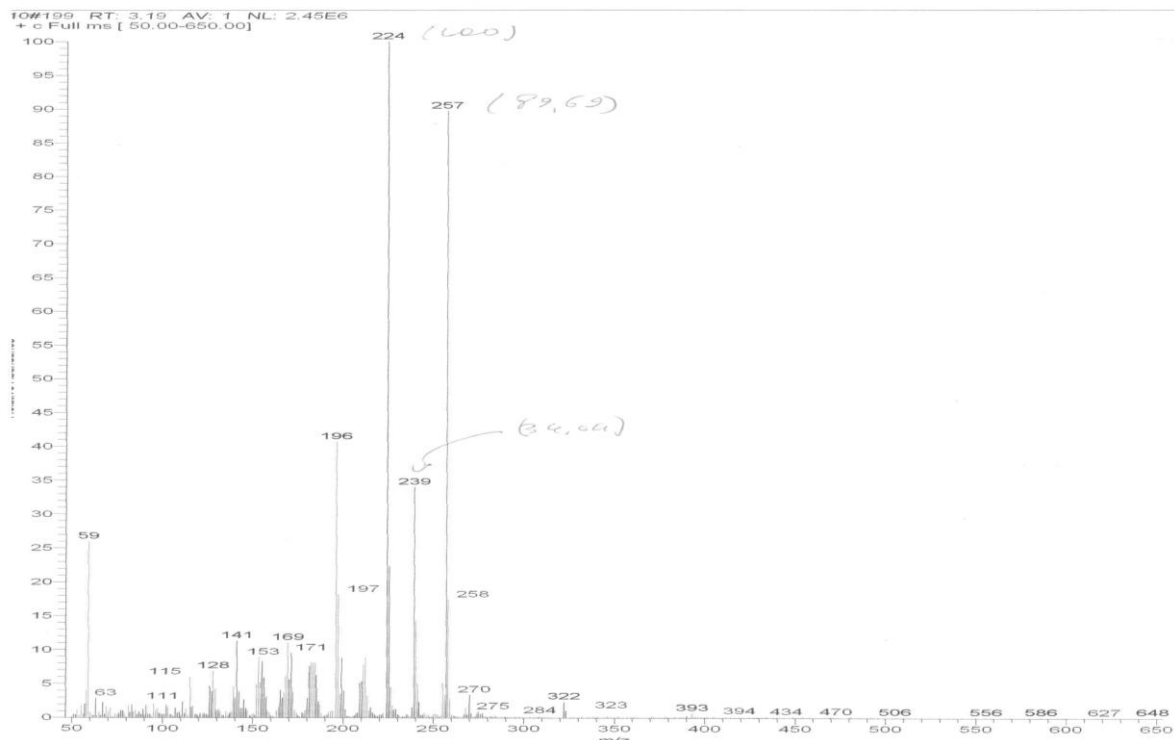

Data File: D:\32Karat\Projects\HPLC\Data\2012\novembre\27-11-12\IP15\_254\_70-30.dat  
 Metodo: D:\32Karat\Projects\HPLC\Method\tamp\_amm\_acetat-acetnitrile\_1ml-min\_254nm\_da70-30a95-5.met  
 Acquisito: 11/27/2012 10:52:54 AM  
 Stampato: 12/04/2012 02:00:54 PM

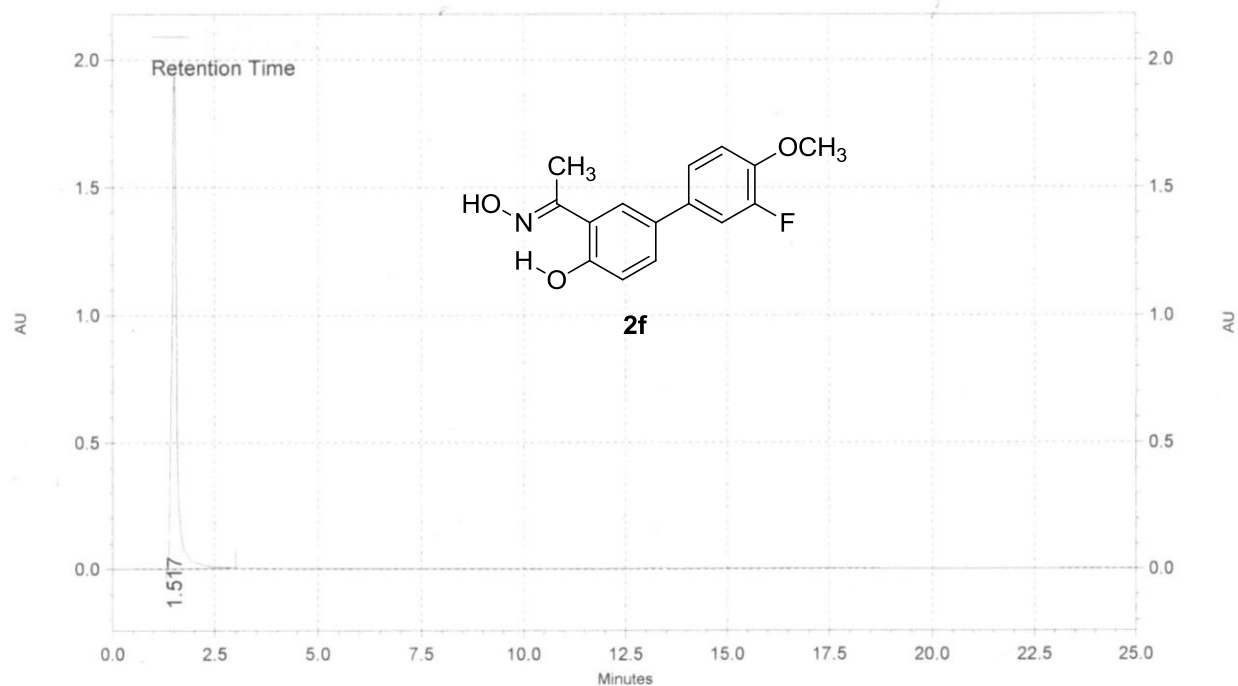

Det 166 Results

| Nome          | Migration Time | Area % | Area     |
|---------------|----------------|--------|----------|
|               | 1.517          | 100.00 | 16442736 |
| <b>Totals</b> |                |        | 100.00   |
|               |                |        | 16442736 |

## Elemental Composition Report

Page 1

## Single Mass Analysis

Tolerance = 10.0 PPM / DBE: min = -1.5, max = 600.0

Element prediction: Off

Number of isotope peaks used for i-FIT = 3

Monoisotopic Mass, Even Electron Ions

136 formula(e) evaluated with 1 results within limits (all results (up to 1000) for each mass)

Elements Used:

C: 0-120 H: 0-180 N: 0-5 O: 0-6 F: 1-1

Kim, Sung Hoon, IP15

University of Illinois, SCS, Mass Spectrometry Lab

Qtof\_54239 43 (3.215) AM (Cen,3, 80.00, Ar,15000.0,558.36,0.70,LS 3); Sm (SG, 2x5.00); Cm (43:45)

Q-tof UE521

1: TOF MS ES+

2.51e+003

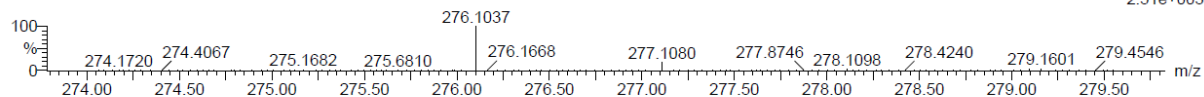

Minimum:

Maximum: 5.0 10.0 -1.5

Mass

| Mass     | Calc. Mass | mDa | PPM | DBE | i-FIT | Formula        |
|----------|------------|-----|-----|-----|-------|----------------|
| 276.1037 | 276.1036   | 0.1 | 0.4 | 8.5 | 0.2   | C15 H15 N O3 F |



Data File: D:\32Karat\Projects\HPLC\Data\2012\novembre\29-11-12\IP16\_254\_70-30.dat  
 Metodo: D:\32Karat\Projects\HPLC\Method\tamp\_amm\_acetat-acetnitrile\_1ml-min\_254nm\_da70-30a95-5.met  
 Acquisito: 11/29/2012 1:07:35 PM  
 Stampato: 12/05/2012 08:51:17 AM

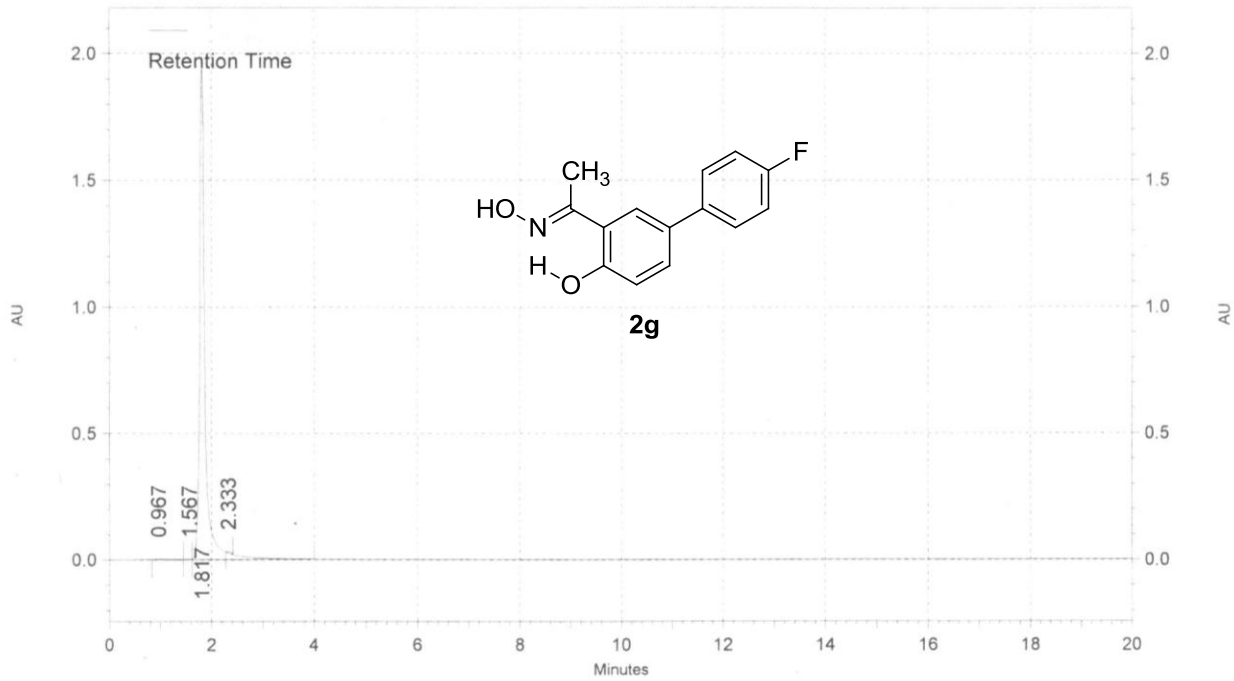

Det 166 Results

| Nome | Migration Time | Area % | Area     |
|------|----------------|--------|----------|
|      | 0.967          | 0.23   | 33123    |
|      | 1.567          | 0.07   | 10066    |
|      | 1.817          | 99.50  | 14332048 |
|      | 2.333          | 0.20   | 28509    |

|        |  |        |          |
|--------|--|--------|----------|
| Totals |  | 100.00 | 14403746 |
|--------|--|--------|----------|

Elemental Composition Report

Single Mass Analysis

Tolerance = 10.0 PPM / DBE: min = -1.5, max = 600.0

Element prediction: Off

Number of isotope peaks used for i-FIT = 3

Monoisotopic Mass, Even Electron Ions

121 formula(e) evaluated with 1 results within limits (all results (up to 1000) for each mass)

Elements Used:

C: 0-120 H: 0-180 N: 0-5 O: 0-6 F: 1-1

Kim, Sung Hoon, IP16 University of Illinois, SCS, Mass Spectrometry Lab  
 Qtof\_54240 47 (3.515) AM (Cen,3, 80.00, Ar,15000.0,558.36,0.70,LS 3); Sm (SG, 2x5.00); Cm (47:49)

Q-tof UE521  
 1: TOF MS ES+  
 3.54e+003

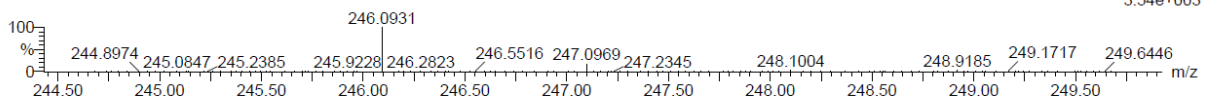

Minimum: -1.5  
 Maximum: 5.0 10.0 600.0

| Mass     | Calc. Mass | mDa | PPM | DBE | i-FIT | Formula        |
|----------|------------|-----|-----|-----|-------|----------------|
| 246.0931 | 246.0930   | 0.1 | 0.4 | 8.5 | 2.0   | C14 H13 N O2 F |

Data File: D:\32Karat\Projects\HPLC\Data\2012\novembre\28-11-12\IP17\_254\_70-30.dat  
 Metodo: D:\32Karat\Projects\HPLC\Method\tamp\_amm\_acetat-acetnitrile\_1ml-min\_254nm\_da70-30a95-5.met  
 Acquisito: 11/28/2012 9:30:03 AM  
 Stampato: 12/05/2012 08:32:01 AM

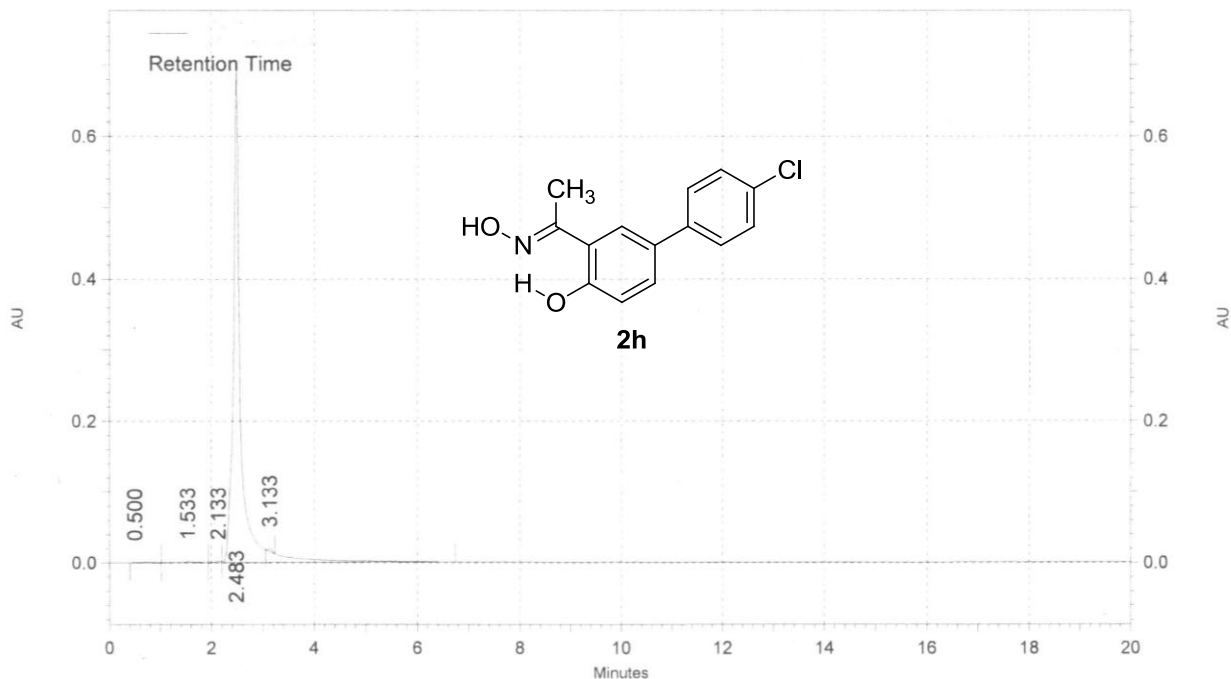

Det 166 Results

| Nome          | Migration Time | Area % | Area           |
|---------------|----------------|--------|----------------|
|               | 0.500          | 0.27   | 18862          |
|               | 1.533          | 0.38   | 26858          |
|               | 2.133          | 0.26   | 18524          |
|               | 2.483          | 98.79  | 6999710        |
|               | 3.133          | 0.31   | 21749          |
| <b>Totals</b> |                |        | <b>7085703</b> |

Elemental Composition Report

Single Mass Analysis

Tolerance = 10.0 PPM / DBE: min = -1.5, max = 600.0  
 Element prediction: Off  
 Number of isotope peaks used for i-FIT = 3

Monoisotopic Mass, Even Electron Ions

121 formula(e) evaluated with 1 results within limits (all results (up to 1000) for each mass)

Elements Used:

C: 0-120 H: 0-180 N: 0-5 O: 0-6 Cl: 1-1

Kim, Sung Hoon, IP17

University of Illinois, SCS, Mass Spectrometry Lab

Qtof\_54241 50 (3.739) AM (Cen,3, 80.00, Ar,15000.0,558.36,0.70,LS 3); Sm (SG, 2x5.00); Cm (50:52)

Q-tof UE521  
 1: TOF MS ES+  
 3.75e+003

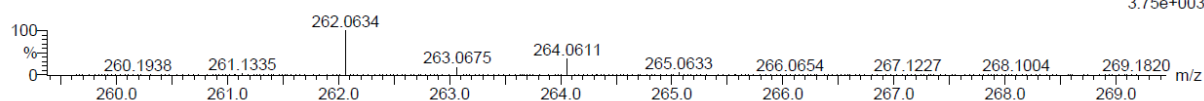

Minimum: -1.5  
 Maximum: 5.0 10.0 600.0

| Mass     | Calc. Mass | mDa  | PPM  | DBE | i-FIT | Formula         |
|----------|------------|------|------|-----|-------|-----------------|
| 262.0634 | 262.0635   | -0.1 | -0.4 | 8.5 | 2.7   | C14 H13 N O2 Cl |

Data File: D:\32Karat\Projects\HPLC\Data\2012\novembre\28-11-12\IP31\_254\_70-30.dat  
 Metodo: D:\32Karat\Projects\HPLC\Method\tamp\_amm\_acetat-acetnitrile\_1ml-min\_254nm\_da70-30a95-5.met  
 Acquisito: 11/28/2012 12:23:24 PM  
 Stampato: 12/04/2012 02:07:24 PM

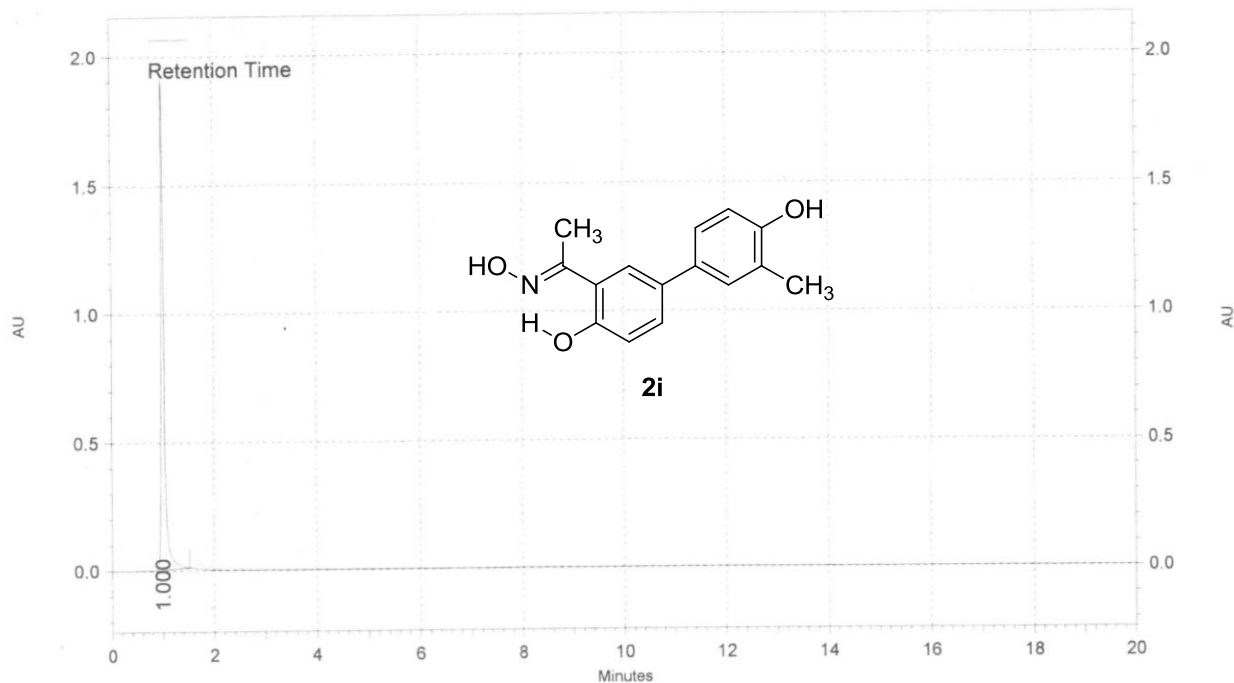

## Det 166 Results

| Nome          | Migration Time | Area % | Area    |
|---------------|----------------|--------|---------|
|               | 1.000          | 100.00 | 8039637 |
| <b>Totals</b> |                |        | 8039637 |

## Elemental Composition Report

Page 1

## Single Mass Analysis

Tolerance = 10.0 PPM / DBE: min = -1.5, max = 600.0

Element prediction: Off

Number of isotope peaks used for i-FIT = 3

## Monoisotopic Mass, Even Electron Ions

136 formula(e) evaluated with 1 results within limits (all results (up to 1000) for each mass)

Elements Used:

C: 0-120 H: 0-180 N: 0-5 O: 0-6

Kim, Sung Hoon, IP31

University of Illinois, SCS, Mass Spectrometry Lab

Qtof\_54245 52 (3.888) AM (Cen,3, 80.00, Ar,15000.0,558.36,0.70,LS 3); Sm (SG, 2x5.00); Cm (52:54)

Q-tof UE521  
1: TOF MS ES+  
2.28e+003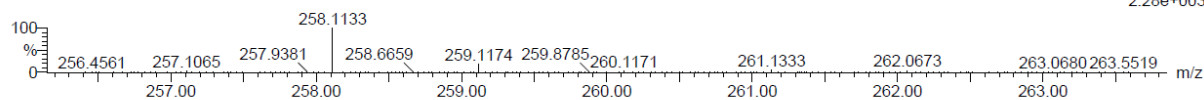

Minimum: -1.5  
 Maximum: 600.0

| Mass     | Calc. Mass | mDa | PPM | DBE | i-FIT | Formula      |
|----------|------------|-----|-----|-----|-------|--------------|
| 258.1133 | 258.1130   | 0.3 | 1.2 | 8.5 | 1.2   | C15 H16 N O3 |

Data File: D:\32Karat\Projects\HPLC\Data\2012\novembre\27-11-12\IP21\_254.dat  
 Metodo: D:\32Karat\Projects\HPLC\Method\tamp\_amm\_acetat-acetonitrile\_1ml-min\_254nm\_da70-30a95-5.met  
 Acquisito: 11/27/2012 11:54:19 AM  
 Stampato: 12/05/2012 08:55:04 AM

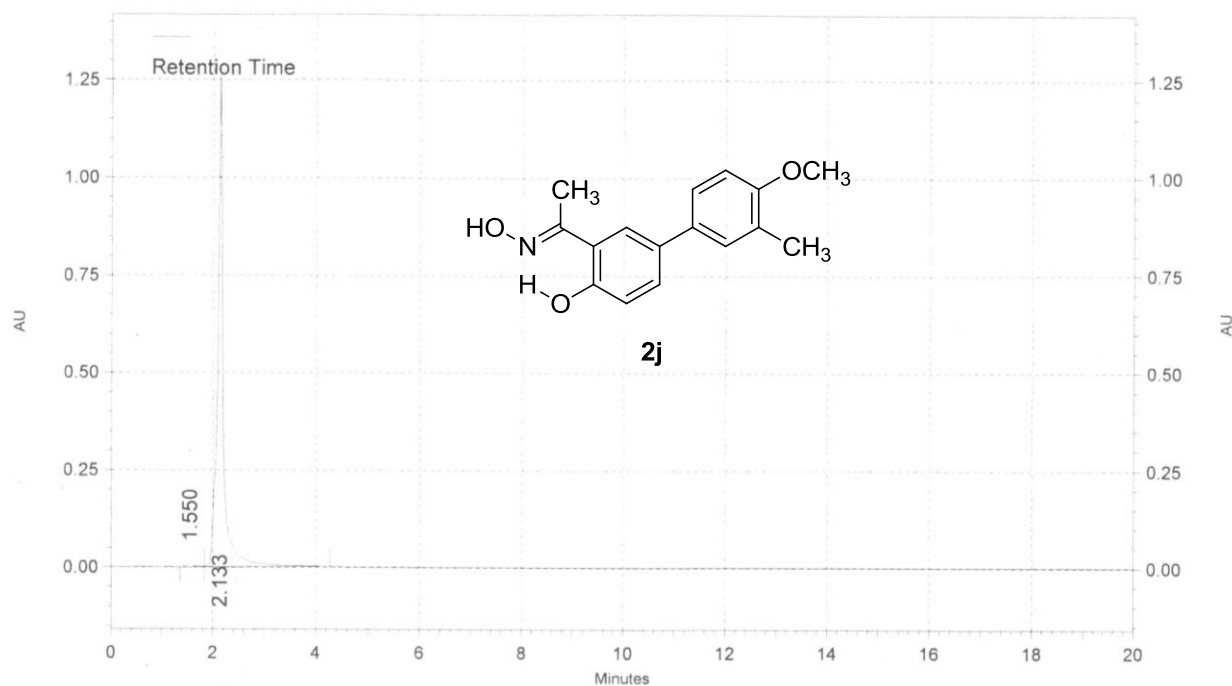

Det 166 Results

| Nome   | Migration Time | Area % | Area    |
|--------|----------------|--------|---------|
|        | 1.550          | 0.83   | 80407   |
|        | 2.133          | 99.17  | 9651676 |
| Totals |                |        |         |
|        |                | 100.00 | 9732083 |

### Elemental Composition Report

Page 1

#### Single Mass Analysis

Tolerance = 10.0 PPM / DBE: min = -1.5, max = 600.0

Element prediction: Off

Number of isotope peaks used for i-FIT = 3

Monoisotopic Mass, Even Electron Ions

143 formula(e) evaluated with 1 results within limits (all results (up to 1000) for each mass)

Elements Used:

C: 0-120 H: 0-180 N: 0-5 O: 0-6

Kim, Sung Hoon, IP21

University of Illinois, SCS, Mass Spectrometry Lab

Qtof\_54242 49 (3.663) AM (Cen,3, 80.00, Ar,15000.0,558.36,0.70,LS 3); Sm (SG, 2x5.00); Cm (49:50)

Q-tof UE521

1: TOF MS ES+

4.51e+003

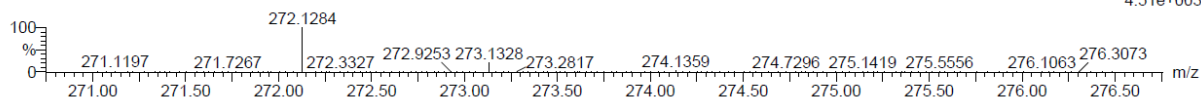

Minimum: -1.5  
 Maximum: 5.0 10.0 600.0

| Mass     | Calc. Mass | mDa  | PPM  | DBE | i-FIT | Formula      |
|----------|------------|------|------|-----|-------|--------------|
| 272.1284 | 272.1287   | -0.3 | -1.1 | 8.5 | 9.0   | C16 H18 N O3 |

Data File: D:\32Karat\Projects\HPLC\Data\2012\novembre\30-11-12\IP32\_254.dat

Metodo:

D:\32Karat\Projects\HPLC\Method\tamp\_amm\_acetat-acetonitrile\_1ml-min\_254nm\_da70-30a95-5.met

Acquisito: 11/30/2012 12:41:34 PM

Stampato: 12/04/2012 02:29:11 PM

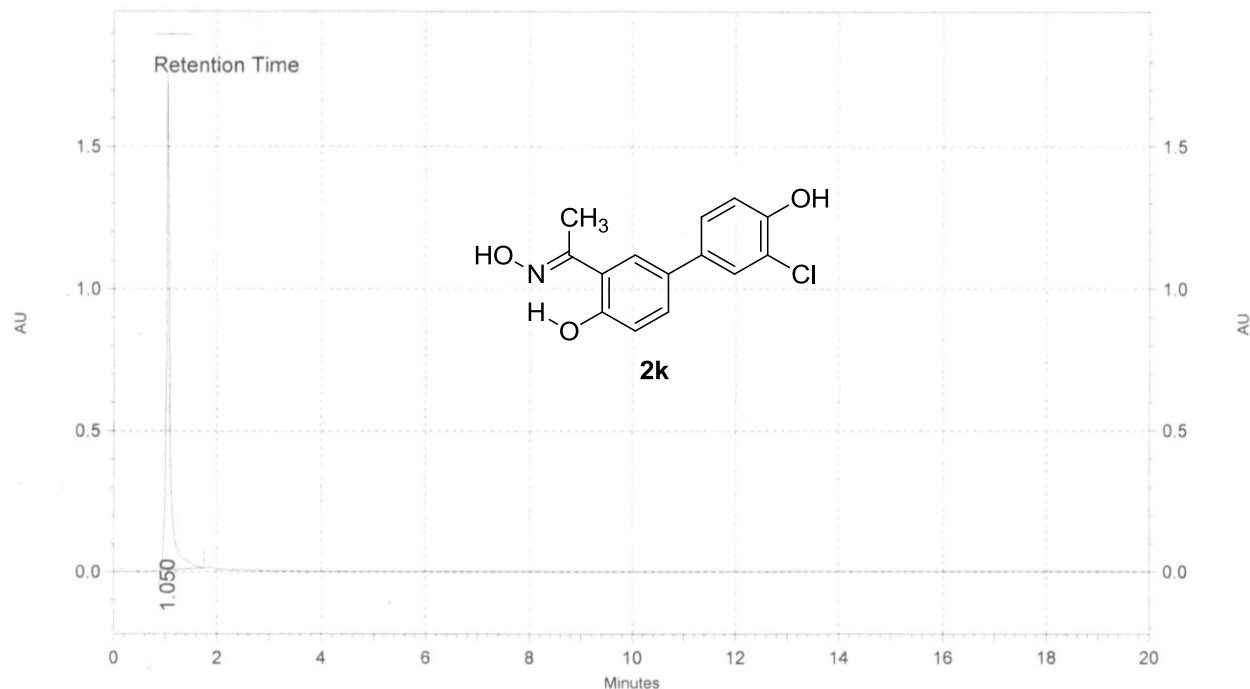

Det 166 Results

| Nome          | Migration Time | Area % | Area    |
|---------------|----------------|--------|---------|
|               | 1.050          | 100.00 | 8527657 |
| <b>Totals</b> |                |        |         |
|               |                | 100.00 | 8527657 |

**Elemental Composition Report**

Page 1

**Single Mass Analysis**

Tolerance = 10.0 PPM / DBE: min = -1.5, max = 600.0

Element prediction: Off

Number of isotope peaks used for i-FIT = 3

Monoisotopic Mass, Even Electron Ions

129 formula(e) evaluated with 1 results within limits (all results (up to 1000) for each mass)

Elements Used:

C: 0-120 H: 0-180 N: 0-5 O: 0-6 Cl: 1-1

Kim, Sung Hoon, IP32

University of Illinois, SCS, Mass Spectrometry Lab

Qtof\_54246 41 (3.065) AM (Cen,3, 80.00, Ar,15000.0,558.36,0.70,LS 3); Sm (SG, 2x5.00); Cm (41:42)

Q-tof UE521

1: TOF MS ES+

1.88e+003

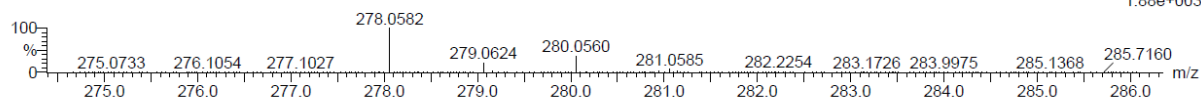

Minimum: -1.5  
 Maximum: 5.0 10.0 600.0

| Mass     | Calc. Mass | mDa  | PPM  | DBE | i-FIT | Formula         |
|----------|------------|------|------|-----|-------|-----------------|
| 278.0582 | 278.0584   | -0.2 | -0.7 | 8.5 | 11.6  | C14 H13 N O3 Cl |

Data File: D:\32Karat\Projects\HPLC\Data\2012\novembre\30-11-12\IP22\_254\_70-30.dat

Metodo:

D:\32Karat\Projects\HPLC\Method\tamp\_amm\_acetat-acetnitrile\_1ml-min\_254nm\_da70-30a95-5.met

Acquisito: 11/30/2012 11:37:45 AM

Stampato: 12/04/2012 02:27:49 PM

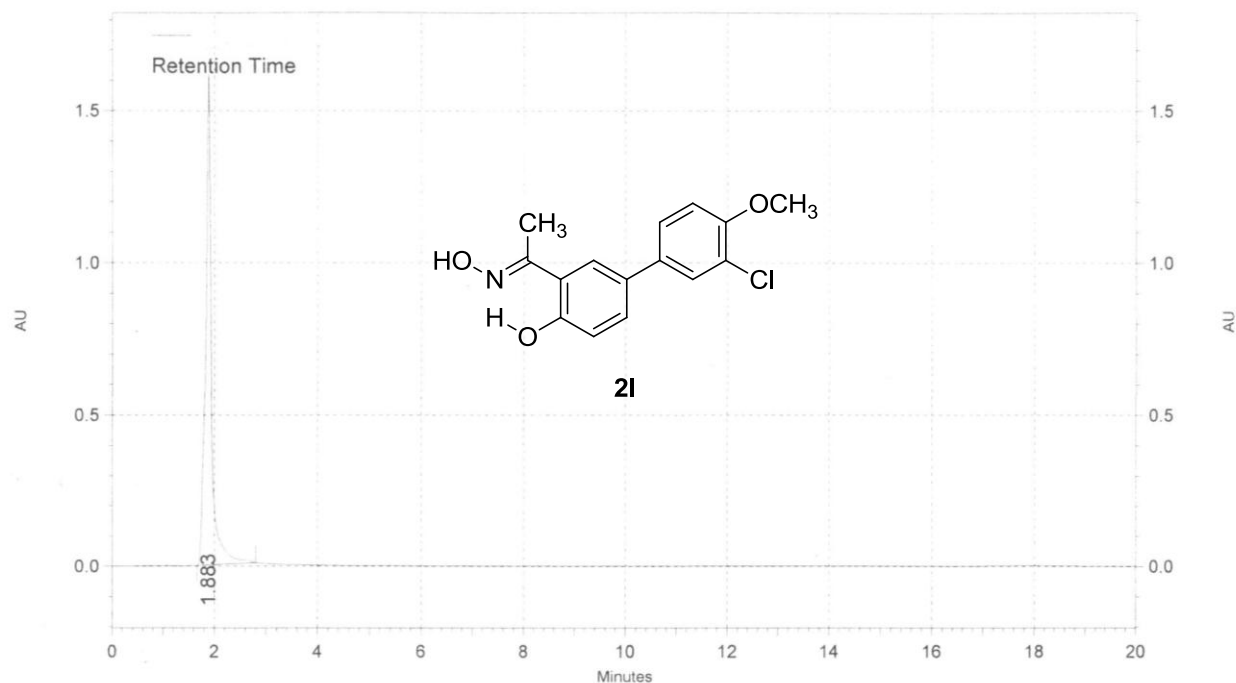

Det 166 Results

| Nome          | Migration Time | Area % | Area     |
|---------------|----------------|--------|----------|
|               | 1.883          | 100.00 | 13021334 |
| <b>Totals</b> |                |        |          |
|               |                | 100.00 | 13021334 |

## Elemental Composition Report

Page 1

## Single Mass Analysis

Tolerance = 10.0 PPM / DBE: min = -1.5, max = 600.0

Element prediction: Off

Number of isotope peaks used for i-FIT = 3

Monoisotopic Mass, Even Electron Ions

136 formula(e) evaluated with 1 results within limits (all results (up to 1000) for each mass)

Elements Used:

C: 0-120 H: 0-180 N: 0-5 O: 0-6 Cl: 1-1

Kim, Sung Hoon, IP22

University of Illinois, SCS, Mass Spectrometry Lab

Qtot\_54244 50 (3.738) AM (Cen,3, 80.00, Ar,15000.0,558.36,0.70,LS 3); Sm (SG, 2x5.00); Cm (50:52)

Q-tof UE521

1: TOF MS ES+

4.61e+003

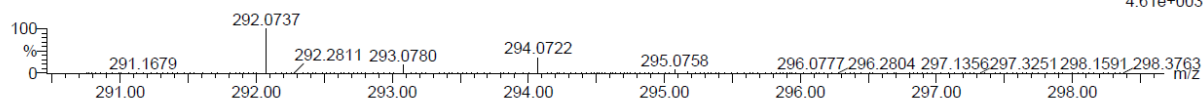

Minimum:

Maximum: 5.0 10.0 -1.5 600.0

| Mass     | Calc. Mass | mDa  | PPM  | DBE | i-FIT | Formula         |
|----------|------------|------|------|-----|-------|-----------------|
| 292.0737 | 292.0740   | -0.3 | -1.0 | 8.5 | 0.3   | C15 H15 N O3 Cl |

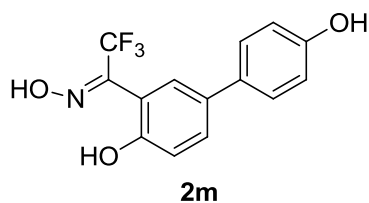

## Elemental Composition Report

Page 1

### Single Mass Analysis

Tolerance = 10.0 PPM / DBE: min = -1.5, max = 600.0

Element prediction: Off

Number of isotope peaks used for i-FIT = 3

Monoisotopic Mass, Even Electron Ions

140 formula(e) evaluated with 1 results within limits (all results (up to 1000) for each mass)

Elements Used:

C: 0-120 H: 0-180 N: 0-6 O: 0-6 F: 3-3

Kim, Sung Hoon, 10-10-2014-BL-29\_Fillipo\_HRMS University of Illinois, SCS, Mass Spectrometry Lab  
 Qtof\_55319a 30 (2.252) AM (Cen,3, 80.00, Ar,15000.0,716.46,0.70,LS 3); Sm (SG, 2x5.00); Cm (30)

Q-tof UE521  
 1: TOF MS ES+  
 2.12e+002

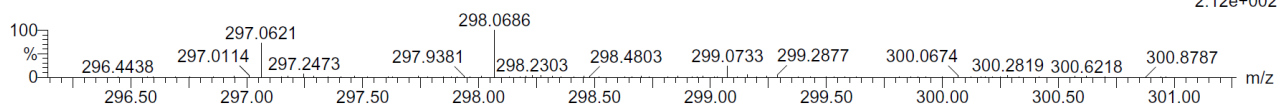

Minimum: -1.5  
 Maximum: 5.0 10.0 600.0

| Mass     | Calc. Mass | mDa  | PPM  | DBE | i-FIT | Formula         |
|----------|------------|------|------|-----|-------|-----------------|
| 298.0686 | 298.0691   | -0.5 | -1.7 | 8.5 | 2.9   | C14 H11 N O3 F3 |

## Analytical data on intermediate compounds

**1-(6-Hydroxy-3-(4-methoxyphenyl)phenyl)ethanone (5e).** (58% yield from **3**)  $^1\text{H}$  NMR ( $\text{CDCl}_3$ )  $\delta$  (ppm): 2.69 (s, 3H), 3.86 (s, 3H), 6.99 (AA'XX', 2H,  $J_{AX} = 8.4$  Hz,  $J_{AA'/XX'} = 2.2$  Hz), 7.05 (d, 1H,  $J = 8.4$  Hz), 7.46 (AA'XX', 2H,  $J_{AX} = 8.4$  Hz,  $J_{AA'/XX'} = 2.2$  Hz), 7.66 (dd, 1H,  $J = 8.4, 3.0$  Hz), 7.86 (d, 1H,  $J = 3.0$  Hz), 12.23 (*exchangeable* s, 1H).

**1-(6-Hydroxy-3-(3-fluoro-4-methoxyphenyl)phenyl)ethanone (5f).** (66% yield from **3**)  $^1\text{H}$  NMR ( $\text{CDCl}_3$ )  $\delta$  (ppm): 2.70 (s, 3H), 3.94 (s, 3H), 6.99-7.09 (m, 2H), 7.22-7.31 (m, 2H), 7.65 (dd, 1H,  $J = 8.4, 2.4$  Hz), 7.84 (d, 1H,  $J = 2.4$  Hz), 12.26 (*exchangeable* s, 1H).

**1-(6-Hydroxy-3-(4-fluorophenyl)phenyl)ethanone (5g).** (55% yield from **3**)  $^1\text{H}$  NMR ( $\text{CDCl}_3$ )  $\delta$  (ppm): 2.70 (s, 3H), 7.06 (d, 1H,  $J = 8.8$  Hz), 7.14 (double AA'XX', 2H,  $^3J_{\text{HF-o}} = 9.0$  Hz,  $J_{AX} = 8.8$  Hz,  $J_{AA'/XX'} = 2.6$  Hz), 7.49 (double AA'XX', 2H,  $^4J_{\text{HF-m}} = 5.6$  Hz,  $J_{AX} = 8.8$  Hz,  $J_{AA'/XX'} = 2.6$  Hz), 7.66 (dd, 1H,  $J = 8.8, 2.4$  Hz), 7.86 (d, 1H,  $J = 2.4$  Hz), 12.27 (*exchangeable* s, 1H).

**1-(6-Hydroxy-3-(4-chlorophenyl)phenyl)ethanone (5h).** (53% yield from **3**)  $^1\text{H}$  NMR ( $\text{CDCl}_3$ )  $\delta$  (ppm): 2.70 (s, 3H), 7.07 (d, 1H,  $J = 8.8$  Hz), 7.38-7.50 (m, 4H), 7.67 (dd, 1H,  $J = 8.8, 2.4$  Hz), 7.88 (d, 1H,  $J = 2.4$  Hz), 12.29 (*exchangeable* s, 1H).

**1-(6-Hydroxy-3-(3-methyl-4-methoxyphenyl)phenyl)ethanone (5j).** (72% yield from **3**)  $^1\text{H}$  NMR ( $\text{CDCl}_3$ )  $\delta$  (ppm): 2.30 (s, 3H), 2.70 (s, 3H), 3.88 (s, 3H), 6.88-6.92 (m, 1H), 7.04 (d, 1H,  $J = 8.4$  Hz), 7.26-7.35 (m, 2H), 7.67 (dd, 1H,  $J = 8.4, 2.6$  Hz), 7.85 (d, 1H,  $J = 2.6$  Hz), 12.22 (*exchangeable* s, 1H).

**1-(6-Hydroxy-3-(3-chloro-4-methoxyphenyl)phenyl)ethanone (5l).** (59% yield from **3**)  $^1\text{H}$  NMR ( $\text{CDCl}_3$ )  $\delta$  (ppm): 2.70 (s, 3H), 3.95 (s, 3H), 7.00 (d, 1H,  $J = 8.8$  Hz), 7.05 (d, 1H,  $J = 8.4$  Hz), 7.38 (dd, 1H,  $J = 8.8, 2.4$  Hz), 7.55 (d, 1H,  $J = 2.8$  Hz), 7.65 (dd, 1H,  $J = 8.6, 2.8$  Hz), 7.83 (d, 1H,  $J = 2.4$  Hz), 12.26 (*exchangeable* s, 1H).



**1-(6-Hydroxy-3-(4-methoxyphenyl)phenyl)propan-1-one (6).** (58% yield from **4**)  $^1\text{H}$  NMR ( $\text{CDCl}_3$ )  $\delta$  (ppm): 1.27 (t, 3H,  $J = 7.6$  Hz), 3.11 (q, 2H,  $J = 7.6$  Hz), 3.86 (s, 3H), 6.98 (AA'XX', 2H,  $J_{AX} = 8.8$  Hz,  $J_{AA'XX'} = 2.8$  Hz), 7.04 (d, 1H,  $J = 8.4$  Hz), 7.46 (AA'XX', 2H,  $J_{AX} = 8.6$  Hz,  $J_{AA'XX'} = 2.4$  Hz), 7.64 (dd, 1H,  $J = 8.4, 2.8$  Hz), 7.89 (d, 1H,  $J = 2.8$  Hz), 12.32 (*exchangeable s*, 1H).

**1-(6-Hydroxy-3-(3-fluoro-4-methoxyphenyl)phenyl)propan-1-one (7).** (76% yield from **4**)  $^1\text{H}$  NMR ( $\text{CDCl}_3$ )  $\delta$  (ppm): 1.27 (t, 3H,  $J = 7.2$  Hz), 3.11 (q, 2H,  $J = 7.3$  Hz), 3.94 (s, 3H), 6.99-7.07 (m, 2H), 7.20-7.30 (m, 2H), 7.62 (dd, 1H,  $J = 8.6, 2.4$  Hz), 7.88 (d, 1H,  $J = 2.4$  Hz), 12.34 (*exchangeable s*, 1H).

**1-(6-Methoxy-3-(4-methoxyphenyl)phenyl)-2,2,2-trifluoroethanone (12).** (84% yield from **11**)  $^1\text{H}$  NMR ( $\text{CDCl}_3$ )  $\delta$  (ppm): 3.85 (s, 3H), 3.95 (s, 3H), 6.98 (AA'XX', 2H,  $J_{AX} = 9.0$  Hz,  $J_{AA'XX'} = 2.2$  Hz), 7.06 (d, 1H,  $J = 8.6$  Hz), 7.47 (AA'XX', 2H,  $J_{AX} = 9.0$  Hz,  $J_{AA'XX'} = 2.5$  Hz), 7.76 (dd, 1H,  $J = 8.8, 2.2$  Hz), 7.83 (d, 1H,  $J = 2.2$  Hz).

**1-(6-Hydroxy-3-(4-hydroxyphenyl)phenyl)ethanone (8a).** (75% yield from **5e**)  $^1\text{H}$  NMR ( $\text{CDCl}_3$ )  $\delta$  (ppm): 2.69 (s, 3H), 6.92 (AA'XX', 2H,  $J_{AX} = 8.4$  Hz,  $J_{AA'XX'} = 3.2$  Hz), 7.05 (d, 1H,  $J = 9.2$  Hz), 7.40 (AA'XX', 2H,  $J_{AX} = 8.4$  Hz,  $J_{AA'XX'} = 3.2$  Hz), 7.66 (dd, 1H,  $J = 2.2, 9.2$  Hz), 7.85 (d, 1H,  $J = 2.2$  Hz), 12.23 (*exchangeable s*, 1H).

**1-(6-Hydroxy-3-(4-hydroxyphenyl)phenyl)propan-1-one (8b).** (80% yield from **6**)  $^1\text{H}$  NMR ( $\text{CDCl}_3$ )  $\delta$  (ppm): 1.26 (t, 3H,  $J = 7.0$  Hz), 3.11 (q, 2H,  $J = 7.0$  Hz), 6.92 (AA'XX', 2H,  $J_{AX} = 8.2$  Hz,  $J_{AA'XX'} = 3.0$  Hz), 7.03 (d, 1H,  $J = 8.8$  Hz), 7.40 (AA'XX', 2H,  $J_{AX} = 8.2$  Hz,  $J_{AA'XX'} = 2.8$  Hz), 7.64 (dd, 1H,  $J = 8.8, 2.4$  Hz), 7.88 (d, 1H,  $J = 2.4$  Hz), 8.02 (*exchangeable bs*, 1H), 12.31 (*exchangeable s*, 1H).

**1-(6-Hydroxy-3-(3-fluoro-4-hydroxyphenyl)phenyl)ethanone (8c).** (86% yield from **5f**)  $^1\text{H}$  NMR ( $\text{CDCl}_3$ )  $\delta$  (ppm): 2.70 (s, 3H), 5.22 (*exchangeable bs*, 1H), 7.03-7.12 (m, 2H), 7.19-7.30 (m, 2H), 7.64 (dd, 1H,  $J = 8.8, 2.4$  Hz), 7.83 (d, 1H,  $J = 2.4$  Hz), 12.25 (*exchangeable s*, 1H).

**1-(6-Hydroxy-3-(3-fluoro-4-hydroxyphenyl)phenyl)propan-1-one (8d).** (76% yield from **7**)  $^1\text{H}$  NMR ( $\text{CDCl}_3$ )  $\delta$  (ppm): 1.27 (t, 3H,  $J = 7.2$  Hz), 3.11 (q, 2H,  $J = 7.2$  Hz), 5.20 (*exchangeable* bs, 1H), 7.03-7.12 (m, 2H), 7.18-7.29 (m, 2H), 7.62 (dd, 1H,  $J = 8.8, 2.4$  Hz), 7.87 (d, 1H,  $J = 2.4$  Hz), 12.35 (*exchangeable* s, 1H).

**1-(6-Hydroxy-3-(3-methyl-4-hydroxyphenyl)phenyl)ethanone (8i).** (82% yield from **5j**)  $^1\text{H}$  NMR ( $\text{CDCl}_3$ )  $\delta$  (ppm): 2.32 (s, 3H), 2.69 (s, 3H), 4.90 (*exchangeable* bs, 1H), 6.85 (d, 1H,  $J = 7.4$  Hz), 7.02 (d, 1H,  $J = 7.6$  Hz), 7.20-7.29 (m, 2H), 7.64 (dd, 1H,  $J = 7.6, 2.0$  Hz), 7.84 (d, 1H,  $J = 2.0$  Hz), 12.22 (*exchangeable* s, 1H).

**1-(6-Hydroxy-3-(3-chloro-4-hydroxyphenyl)phenyl)ethanone (8k).** (66% yield from **5l**)  $^1\text{H}$  NMR ( $\text{CDCl}_3$ )  $\delta$  (ppm): 2.70 (s, 3H), 5.58 (*exchangeable* s, 1H), 7.05 (d, 1H,  $J = 8.6$  Hz), 7.10 (d, 1H,  $J = 8.2$  Hz), 7.35 (dd, 1H,  $J = 8.4, 2.4$  Hz), 7.49 (d, 1H,  $J = 2.8$  Hz), 7.63 (dd, 1H,  $J = 8.6, 2.8$  Hz), 7.82 (d, 1H,  $J = 2.4$  Hz), 12.26 (*exchangeable* s, 1H).

**1-(6-Hydroxy-3-(4-hydroxyphenyl)phenyl)-2,2,2-trifluoroethanone (13).** (52% yield from **12**)  $^1\text{H}$  NMR ( $\text{CDCl}_3$ )  $\delta$  (ppm): 5.19 (*exchangeable* s, 1H), 6.93 (AA'XX', 2H,  $J_{AX} = 8.2$  Hz,  $J_{AA'/XX'} = 2.3$  Hz), 7.15 (d, 1H,  $J = 8.8$  Hz), 7.40 (AA'XX', 2H,  $J_{AX} = 8.2$  Hz,  $J_{AA'/XX'} = 2.3$  Hz), 7.81 (dd, 1H,  $J = 8.8, 2.4$  Hz), 7.92 (quintet, 1H,  $J = 2.2$  Hz), 11.03 (*exchangeable* s, 1H).

**Table S1.** Body weight vs. treatment time of animals treated with **1**, **2a**, or **2c**.

| Compound  | Animal weight (grams) after time (days) <sup>a</sup> |              |              |
|-----------|------------------------------------------------------|--------------|--------------|
|           | 0                                                    | 7            | 14           |
| <b>1</b>  | 23.22 ± 1.75                                         | 25.14 ± 1.94 | 24.78 ± 1.74 |
| <b>2a</b> | 24.08 ± 2.48                                         | 25.95 ± 2.68 | 26.25 ± 2.80 |
| <b>2c</b> | 23.06 ± 2.32                                         | 25.18 ± 2.46 | 24.90 ± 2.23 |

<sup>a</sup>Average of ≥ 4 mice ± SD
